# Supplementary material for: Возможности и перспективы развития Центра космического мониторинга Арктики САФУ для решения задач рационального природопользования
Source: Royal Society of Chemistry journal article supplement (doi:10.1039/d3ra07098k), 2013-01-01
Supplement: d3ra07098k1.pdf [file d3ra07098k1.pdf]

## Supporting Information

### An in depth physicochemical investigation of drug-loaded core-shell UiO66 nanoMOFs

Mengli Ding<sup>a</sup>, Borja Moreira-Álvarez<sup>b\*</sup>, Francisco Calderón Celis<sup>b\*</sup>, Jose Manuel Costa-Fernández<sup>b</sup>, Jorge Ruiz Encinar<sup>b</sup>, and Ruxandra Gref<sup>a\*</sup>

**Abstract:** ICP-MS and AF4 instrumental and operational parameters, TEM images of UiO66 and CD-MO@UiO66 nanoMOFs, AF4-MALS analysis of CD-MO@UiO66-cisplatin.

**Table S1.** Operational parameters used in the FIA-ICP-MS/MS and AF4-ICP-MS/MS analyses.

| ICP-MS Parameters                | Flow Injection Analysis | AF4  |
|----------------------------------|-------------------------|------|
| RF Power (W)                     | 1550                    |      |
| Sampling depth (mm)              | 8                       |      |
| Carrier gas (L/min)              | 1.05                    | 1.10 |
| Nebulizer pump (rps)             | 0.2                     | 0.3  |
| O <sub>2</sub> cell gas flow (%) | 30                      |      |
| OctBias (V)                      | -3                      |      |
| Axial Acceleration (V)           | 1.5                     |      |
| Oct RF (V)                       | 180                     |      |
| Energy discrimination (V)        | -7                      |      |
| Integration time (s)             | 0.1                     |      |

**Table S2.** AF4 operational parameters and separation program.

| AF4 Parameters                   |     |
|----------------------------------|-----|
| Injection volume (μL)            | 20  |
| Injection time (min)             | 2   |
| Tip flow rate (mL/min)           | 0.2 |
| Transition time (min)            | 1   |
| Initial cross flow rate (mL/min) | 0.3 |
| Cross flow linear decay (min)    | 10  |
| Cross flow final constant (min)  | 5   |
| Detector flow rate (mL/min)      | 0.3 |

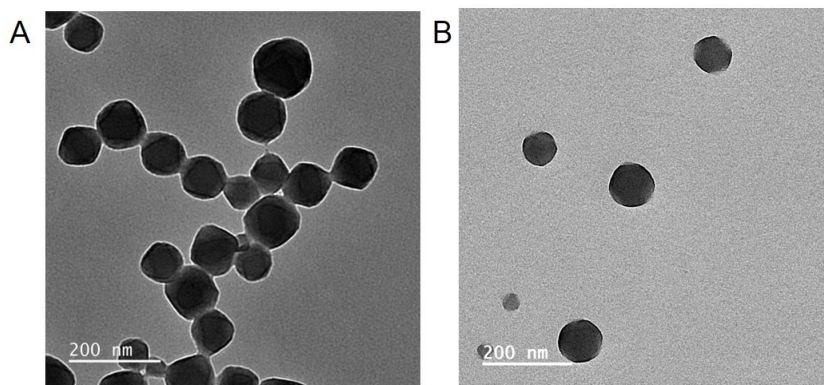

**Figure S1.** TEM images of (A) UiO66 nanoMOFs and (B) CD-MO@UiO66.

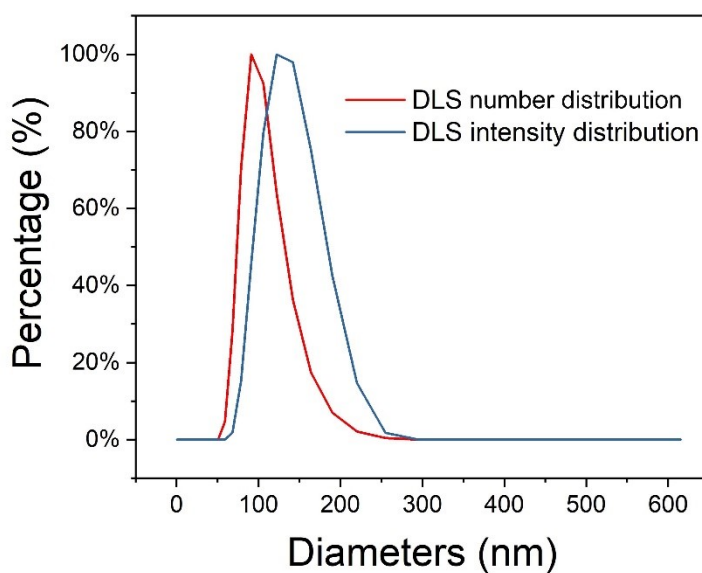

**Figure S2.** DLS number distribution and intensity distribution of UiO66 nanoMOFs.

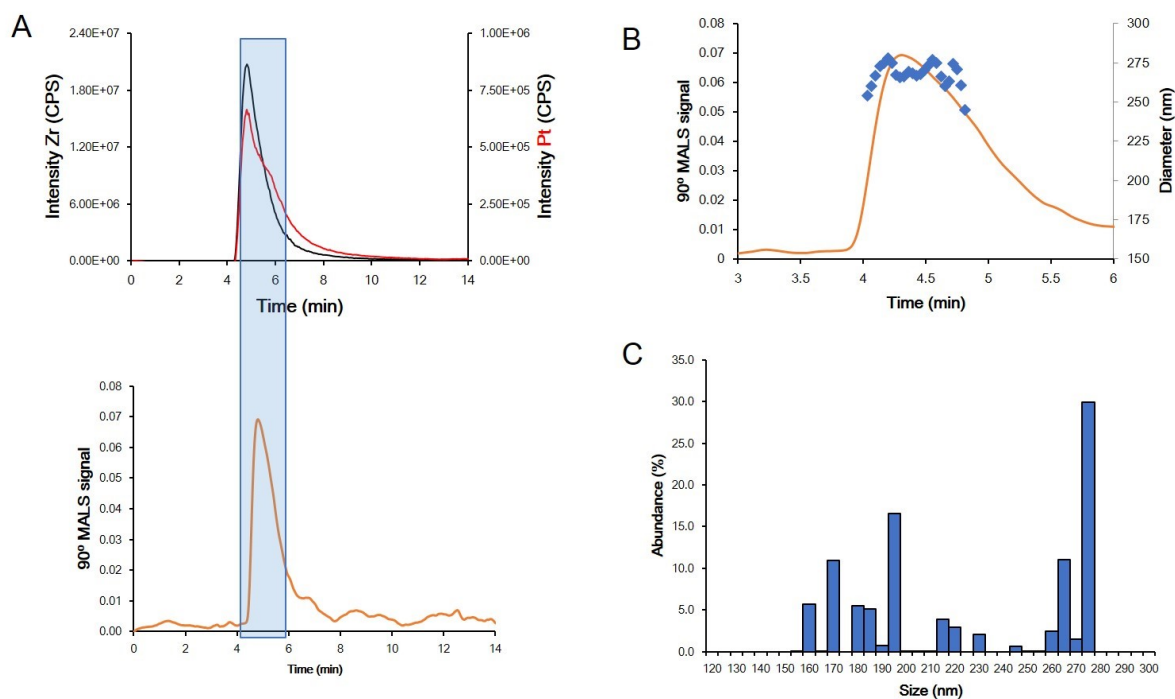

**Figure S3.** (A) AF4-MALS-ICP-MS/MS fractogram of CD-MO@UiO66-cisplatin, (B) MALS results obtained for the framed area and, (C) histogram of the MALS results.
